# Supplementary material for: Molecular insight into aqueous-phase photolysis and photooxidation of water-soluble organic matter emitted from biomass burning and coal combustion
Source: Copernicus journal article supplement (doi:10.5194/egusphere-2025-561), 2025-03-04
Supplement: Supplementary file 1 [file egusphere-2025-561-supplement-version2.pdf]

## Supporting information

### **Molecular insight into aqueous-phase photolysis and photooxidation of water-soluble organic matter emitted from biomass burning and coal combustion**

Tao Cao<sup>1</sup>, Cuncun Xu<sup>1,2</sup>, Hao Chen<sup>1,2</sup>, Jianzhong Song<sup>1,3,\*</sup>, Jun Li<sup>1,3</sup>, Haiyan Song<sup>4</sup>, Bin Jiang<sup>1,3</sup>, Yin Zhong<sup>1,3</sup>, Ping'an Peng<sup>1,2,3</sup>

<sup>1</sup>State Key Laboratory of Advanced Environmental Technology and Guangdong Provincial Key Laboratory of Environmental Protection and Resources Utilization, Guangzhou Institute of Geochemistry, Chinese Academy of Sciences, Guangzhou 510640, China

<sup>2</sup>University of Chinese Academy of Sciences, Beijing 100049, China

<sup>3</sup>Guangdong-Hong Kong-Macao Joint Laboratory for Environmental Pollution and Control, Guangzhou 510640, China

<sup>4</sup>School of Chemistry, South China Normal University, Universities Town, Guangzhou 510006, China

*\*Correspondence to:* Jianzhong Song, E-mail: songjzh@gig.ac.cn.



## Contents:

1. Text S1. Sample information
2. Text S2. WSOM extraction and measurement
3. Text S3. Optical properties analysis
4. Text S4. FT-ICR MS analysis
5. Table S1. Basic information and elemental composition of rice straw and Yulin coal
6. Table S2. The intensity-weighted average elemental ratios,  $\text{DBE}_w$ ,  $\text{DBE}/C_w$ ,  $\text{AI}_{\text{mod},w}$  and  $\text{NOSC}_w$  of molecular formulas within RS and YL WSOM for fresh, after photolysis and after  $\cdot\text{OH}$  photooxidation.
7. Table S3. Relative abundances (%) of seven categories components within RS and YL WSOM for fresh, after photolysis and after  $\cdot\text{OH}$  photooxidation.
8. Table S4. The number and percentage of molecules resistant, degraded and produced during photolysis and  $\cdot\text{OH}$  photooxidation for RS and YL WSOM.
9. Table S5. The information of number and intensity-weighted average elemental ratios,  $\text{DBE}_w$ ,  $\text{DBE}/C_w$ ,  $\text{AI}_{\text{mod},w}$  and  $\text{NOSC}_w$  for condensed aromatic compounds produced during  $\cdot\text{OH}$  photooxidation in RS and YL WSOM.
10. Table S6. The intensity-weighted average elemental ratios,  $\text{DBE}_w$ ,  $\text{DBE}/C_w$ ,  $\text{AI}_{\text{mod},w}$  and  $\text{NOSC}_w$  for molecular resistant, degraded and produced after photolysis and  $\cdot\text{OH}$  photooxidation in RS and YL WSOM.
11. Figure S1. Spectra of Xe lamp and actual Sunlight
12. Figure S2. Van Krevelen diagrams of molecular formulas within RS WSOM (a:



fresh, c: photolysis, e:  $\cdot$ OH photooxidation) and YL WSOM (b: fresh, d: photolysis, f:  $\cdot$ OH photooxidation). The seven regions represent: I lipids-like, II protein /aliphatic sugar, III carbohydrates, IV unsaturated hydrocarbon, V lignin/CRAM-like, VI condensed aromatic, VII tannins.

13. Figure S3. Van Krevelen diagrams for molecules degraded and produced during photolysis and  $\cdot$ OH photooxidation within RS (upper) and YL WSOM (bottom).



### **Text S1. Sample information**

Rice straw (RS) and Yulin coal (YL) were selected as representative biomass and coal fuel materials for the preparation of combustion-derived WSOM samples. RS was collected in Chuzhou, Anhui Province. As shown in Table S1, the carbon (C), hydrogen (H), oxygen (O), nitrogen (N) and ash contents of RS were 38.3%, 5.74%, 43.8%, 1.90% and 10.3%, respectively. Prior to combustion, RS was sorted and cut into smaller sections to enhance the efficiency of the combustion process. YL coal was collected from Yulin, Shanxi Province. The maturity and volatile content of YL coal were determined to be 0.58% and 34.4%, respectively, confirming its classification as high volatile bituminous coal. Additionally, the ash content of YL coal was measured at 4.22% and the C, H, O, N and S contents of YL coal were 77.0%, 6.07%, 11.6%, 1.01% and 0.17%, respectively.

### **Text S2. WSOM extraction and measurement**

The weighted smoke filters were fragmented into small pieces and subsequently placed into a pre-baked 100 mL glass bottle. Then, 60 mL of ultrapure water was added, and the mixture was subjected to sonication at a constant temperature of 25°C for a duration of 30 min. The supernatant was filtered through a 0.22 µm PTFE membrane, resulting in a solution that serves as the stock solution of water-soluble organic matter (WSOM). The concentration of the WSOM stock solution was quantified using a total organic carbon analyzer (VCPH analyzer, Shimadzu, Kyoto, Japan) in accordance with the non-purgeable organic carbon protocol. After the removal of inorganic carbon, the sample underwent oxidation at a high temperature of



680°C, and the peak area of CO<sub>2</sub> was measured using a non-dispersive infrared detector. The WSOM stock solution was subsequently diluted to approximately 20 mgC/L with ultrapure water, based on the measured concentration. Photolysis experiments will be conducted utilizing this diluted solution.

### Text S3. Optical properties analysis

The absorption coefficient ( $\alpha_\lambda$ , m<sup>-1</sup>) was calculated to estimate the abundance of typical chromophores within WSOM and it can be calculated as following equation:

$$\alpha_\lambda = 2.303 \times \frac{A_\lambda}{l} \quad (1)$$

In this equation, the absorbances at 254nm and 365nm were used ( $A_\lambda$ ),  $l$  represents light path (0.01m). The  $\alpha_{254}$  value indicates the content of aromatic structures and double bonds, which was positively correlated with the amounts and properties of aromatic components. The  $\alpha_{365}$  value represents the light absorption of WSOM in near ultraviolet and visible ranges, which had been widely used to characterize brown carbon (BrC) in atmospheric environments (Hecobian et al., 2010; Jiang et al., 2021b).

The absorption was normalized by organic carbon mass which defined as mass absorbance efficiency (MAE), the MAE at 365 nm (MAE<sub>365</sub>) is an important optical parameter used to characterize the light absorbing capacity of WSOM. It was obtained using the following equation:

$$MAE_\lambda = \frac{A_\lambda}{c \cdot l} * \ln(10) \quad (2)$$

where  $A_\lambda$  is the absorbance at  $\lambda$  nm,  $c$  is the carbon concentration of BrC in solution (mgC



$L^{-1}$ ), and  $l$  is the absorbing path length (0.01m).

The absorption Ångström exponent (AAE) is a measure of the spectral dependence of the light absorption of WSOM solutions, which was calculated by the following equation:

$$A_{\lambda} = K\lambda^{-AAE} \quad (3)$$

where  $A_{\lambda}$  is the absorbance derived from the spectrophotometer at a given wavelength  $\lambda$  (330–400 nm) and  $K$  is a constant.

The PARAFAC was computed using two to nine component models, with non-negativity constraints and a residual analysis; and split half analysis was used to validate the number of fluorescence components. According to the results of the split-half and core consistency analysis, three component models were chosen for further analysis. The identified individual fluorophores were compared with online database OpenFluor (based on the identified fluorophores in nature organic matter and the similarity of results for both excitation and emission wavelength were set at 98%). The relative contribution of individual chromophores was estimated by calculating the maximum fluorescence intensities ( $F_{\max}$ : maximum fluorescence intensity of identified fluorescence components, relative content % =  $F_{\max}/\Sigma F_{\max}$ ).

#### **Text S4. FT-ICR MS analysis**

The samples were ionized in negative-ion mode using an Electrospray Ionization (ESI) source. The ion accumulation time was set to 0.65s and a total of 100 continuous 4M data FT-ICR transients were added to enhance the signal-to-noise ratio and the dynamic range. The



detection mass range was set to  $m/z$  100–800. Mass spectra were calibrated externally with arginine clusters in negative-ion mode using a linear calibration. The final spectrum was internally recalibrated with typical O<sub>5</sub>-class species peaks using quadratic calibration in DataAnalysis 4.4 (Bruker Daltonics). A typical mass-resolving power ( $m/\Delta m_{50\%}$ , where  $\Delta m_{50\%}$  is the magnitude of the mass spectral peak full-width at half-maximum peak height) > 450,000 at  $m/z$  319 with < 0.2 ppm absolute mass error was achieved.

The ultrahigh-resolution FT-ICR mass spectra were processed with custom software. All ions with relative abundances greater than 10 times the standard deviation of the baseline noise were explored. Mathematically possible formulae for these ions were then calculated with a mass tolerance of  $\pm 1$  ppm. The formula CcHhOoNnSs was used to indicate the assigned compounds, in which C, H, O, N, S indicate carbon, hydrogen, oxygen, nitrogen, and sulfur, respectively, and c, h, o, n, s represent the number of atoms of the respective elements. The maximum numbers of atoms for the formula calculator were set as follows: 30 <sup>12</sup>C, 60 <sup>1</sup>H, 20 <sup>16</sup>O, 3 <sup>14</sup>N, 1 <sup>32</sup>S, 1 <sup>13</sup>C, 1 <sup>18</sup>O, and 1 <sup>34</sup>S. The identified formulae containing isotopomers (i.e., <sup>13</sup>C, <sup>18</sup>O, or <sup>34</sup>S) are not discussed. The calculated formulae were further characterized in terms of double-bond equivalents (DBE) and the modified aromaticity index (AImod), based on calculation of the elemental composition CcHhOoNnSs. The DBE value represents the number of rings plus double bonds, which reflects the degree of unsaturation (hydrogen deficiency) in a given compound. The DBE value can be calculated according to Equation (4):

$$\text{DBE} = \frac{2c+2-h+n}{2} \quad (4)$$

All calculated formulae with DBE < 0 and that disobey the nitrogen rule for even- number



electron ions were excluded from the lists. The  $AI_{mod}$  value of each molecular formula was estimated based on the equation proposed by Koch and Dittmar:

$$AI_{mod} = \frac{1+c-0.5o-s-0.5h}{c-0.5o-s-n} \quad (5)$$

Based on the  $AI_{mod}$  values, the molecular formulae can be tentatively classified as aliphatic ( $AI_{mod, w} = 0$ ), non-aromatic compounds ( $0 < AI_{mod} < 0.5$ ), aromatic ( $0.5 \leq AI_{mod} \leq 0.67$ ) and condensed aromatic ( $0.67 < AI_{mod}$ ).

The nominal oxidation state of carbon (NOSC) was used as the degree of oxidation of organic matter, which can be obtained according to the following equation (LaRowe et al., 2011):

$$NOSC = 4 - \frac{4c+h-3n-2o-2s}{c} \quad (6)$$

In the study, the overall properties of the WSOM fractions were assessed with relative abundance weighting because each molecule was present with different intensity. The relative-abundance-weighted molecular weight, elemental ratios, DBE, and  $AI_{mod}$  were calculated from the intensity (Int) of each assigned peak (i) based on the following equations:

$$MW_w = \Sigma(MW_i * Int_i) / \Sigma Int_i$$

$$OM/OC_w = \Sigma(OM/OC_i * Int_i) / \Sigma Int_i$$

$$O/C_w = \Sigma(O/C_i * Int_i) / \Sigma Int_i$$

$$O/N_w = \Sigma(O/N_i * Int_i) / \Sigma Int_i$$

$$O/S_w = \Sigma(O/S_i * Int_i) / \Sigma Int_i$$

$$DBE_w = \Sigma(DBE_i * Int_i) / \Sigma Int_i$$

$$AI_{mod,w} = \Sigma(AI_{mod,i} * Int_i) / \Sigma Int_i$$



$$\text{NOSC}_{\text{w}} = \Sigma(\text{NOSC} \times \text{Int}_i) / \Sigma \text{Int}_i$$

where  $\text{Int}_i$  is the intensity for each individual molecular formula,  $i$ .

Although the negative ESI- FT-ICR MS provided detailed information of WSOM, it should be noted that the composition information is incomplete. According to previous studies, different ionization sources are favorable for different compounds. In fact, BrC is a complex of light-absorbing compounds, the solvent-extractable BrC light absorption is not only attributed to polar compounds but also due to the water-insoluble and less polar compounds such as PAHs and their derivatives. Therefore, other ionization techniques such as positive-ion ESI and APPI are complementary to the negative-ion analysis in further studies.



**Table S1.** Basic information and elemental composition of rice straw and Yulin coal

|              | Rice straw (RS) | Yulin coal (YL)                  |
|--------------|-----------------|----------------------------------|
| C (%)        | 38.3            | 77.0                             |
| H (%)        | 5.74            | 6.07                             |
| O (%)        | 43.8            | 11.6                             |
| N (%)        | 1.90            | 1.01                             |
| S (%)        | -               | 0.17                             |
| Ash (%)      | 10.3            | 4.22                             |
| Maturity (%) | -               | 0.58                             |
| Volatile (%) | -               | 34.4                             |
| Rank         | -               | High volatile<br>bituminous coal |



**Table S2.** The intensity-weighted average elemental ratios, DBE<sub>w</sub>, DBE/C<sub>w</sub>, AI<sub>mod,w</sub> and NOSC<sub>w</sub> of molecular formulas in RS and YL WSOM for fresh, after photolysis and after ·OH photooxidation.

| Samples | Composition           | MW <sub>w</sub> | H/C <sub>w</sub> | O/C <sub>w</sub> | O/N <sub>w</sub> | O/S <sub>w</sub> | DBE <sub>w</sub> | DBE/C <sub>w</sub> | AI <sub>mod,w</sub> | NOSC <sub>w</sub> |
|---------|-----------------------|-----------------|------------------|------------------|------------------|------------------|------------------|--------------------|---------------------|-------------------|
| RS WSOM | Fresh                 | CHO             | 236              | 1.19             | 0.38             |                  | 5.98             | 0.50               | 0.43                | -0.43             |
|         |                       | CHON            | 298              | 1.17             | 0.36             | 4.24             | 7.88             | 0.55               | 0.50                | -0.14             |
|         |                       | CHOS            | 292              | 1.28             | 0.55             | 6.25             | 5.31             | 0.45               | 0.22                | -0.01             |
|         |                       | CHONS           | 327              | 1.29             | 0.56             | 6.50             | 6.88             | 0.48               | 0.23                | 0.27              |
|         |                       | Total           | 252              | 1.19             | 0.38             | 1.05             | 0.19             | 6.40               | 0.51                | -0.35             |
|         | Photolysis            | CHO             | 267              | 1.17             | 0.44             |                  | 6.63             | 0.50               | 0.41                | -0.29             |
|         |                       | CHON            | 342              | 1.15             | 0.39             | 5.14             | 8.89             | 0.54               | 0.47                | -0.08             |
|         |                       | CHOS            | 310              | 1.39             | 0.48             | 5.73             | 5.16             | 0.39               | 0.21                | -0.25             |
|         |                       | CHONS           | 310              | 1.33             | 0.59             | 6.51             | 6.63             | 0.47               | 0.20                | 0.30              |
|         |                       | Total           | 288              | 1.17             | 0.43             | 1.38             | 0.10             | 7.20               | 0.51                | -0.23             |
|         | ·OH<br>Photooxidation | CHO             | 302              | 1.16             | 0.60             |                  | 6.73             | 0.50               | 0.35                | 0.04              |
|         |                       | CHON            | 355              | 1.15             | 0.57             | 7.45             | 8.55             | 0.55               | 0.41                | 0.28              |
|         |                       | CHOS            | 389              | 1.09             | 0.44             | 6.16             | 11.73            | 0.52               | 0.37                | -0.10             |
|         |                       | CHONS           | 362              | 1.34             | 0.68             | 7.14             | 7.14             | 0.47               | 0.20                | 0.50              |
|         |                       | Total           | 319              | 1.16             | 0.59             | 1.88             | 0.26             | 7.36               | 0.52                | 0.10              |



Continued Table S2

| Samples | Composition           | MW <sub>w</sub> | H/C <sub>w</sub> | O/C <sub>w</sub> | O/N <sub>w</sub> | O/S <sub>w</sub> | DBE <sub>w</sub> | DBE/C <sub>w</sub> | AI <sub>mod,w</sub> | NOSC <sub>w</sub> |
|---------|-----------------------|-----------------|------------------|------------------|------------------|------------------|------------------|--------------------|---------------------|-------------------|
| YL WSOM | Fresh                 | CHO             | 218              | 0.95             | 0.39             |                  | 7.07             | 0.62               | 0.60                | -0.17             |
|         |                       | CHON            | 227              | 1.03             | 0.51             | 4.39             | 6.59             | 0.66               | 0.66                | 0.36              |
|         |                       | CHOS            | 255              | 1.23             | 0.56             |                  | 5.34             | 5.14               | 0.49                | 0.10              |
|         |                       | CHONS           | 361              | 1.19             | 0.54             | 7.32             | 7.32             | 7.72               | 0.52                | 0.26              |
|         |                       | Total           | 231              | 1.03             | 0.46             | 1.62             | 1.07             | 6.60               | 0.61                | 0.56              |
|         | Photolysis            | CHO             | 255              | 0.98             | 0.43             |                  | 7.65             | 0.60               | 0.55                | -0.13             |
|         |                       | CHON            | 326              | 1.00             | 0.42             | 6.02             | 9.79             | 0.62               | 0.58                | 0.09              |
|         |                       | CHOS            | 279              | 1.31             | 0.52             |                  | 5.65             | 5.25               | 0.44                | -0.07             |
|         |                       | CHONS           | 326              | 1.22             | 0.53             | 6.59             | 6.59             | 6.77               | 0.52                | 0.27              |
|         |                       | Total           | 268              | 1.02             | 0.43             | 0.89             | 0.60             | 7.70               | 0.59                | -0.09             |
|         | ·OH<br>Photooxidation | CHO             | 293              | 1.02             | 0.57             |                  | 7.54             | 0.57               | 0.46                | 0.12              |
|         |                       | CHON            | 357              | 1.00             | 0.54             | 8.01             | 9.93             | 0.61               | 0.52                | 0.30              |
|         |                       | CHOS            | 342              | 1.16             | 0.51             |                  | 6.38             | 8.64               | 0.50                | 0.01              |
|         |                       | CHONS           | 460              | 0.97             | 0.39             | 5.23             | 5.23             | 17.95              | 0.62                | 0.16              |
|         |                       | Total           | 303              | 1.02             | 0.57             | 1.10             | 0.14             | 7.90               | 0.58                | 0.47              |



**Table S3.** Relative abundances (%) of seven categories components within RS and YL WSOM for fresh, after photolysis and after  $\cdot\text{OH}$  photooxidation.

| Samples    |                                 | Lipids | Protein | Carbohydrate | Unsaturated | Lignin | Condensed | Tannins |
|------------|---------------------------------|--------|---------|--------------|-------------|--------|-----------|---------|
| RS<br>WSOM | Fresh                           | 5.69   | 7.19    | 0.67         | 0.36        | 83.1   | 1.08      | 1.91    |
|            | Photolysis                      | 2.81   | 7.18    | 0.86         | 0.18        | 84.6   | 1.55      | 2.77    |
|            | $\cdot\text{OH}$ Photooxidation | 0.074  | 4.94    | 3.69         | 0.13        | 63.3   | 4.86      | 23.0    |
| YL<br>WSOM | Fresh                           | 0.52   | 1.67    | 0.36         | 0.31        | 88.4   | 2.86      | 5.86    |
|            | Photolysis                      | 0.51   | 3.11    | 0.53         | 0.16        | 88.7   | 4.08      | 2.92    |
|            | $\cdot\text{OH}$ Photooxidation | 0.052  | 2.32    | 0.96         | 0.032       | 73.9   | 5.38      | 17.3    |



**Table S4.** The number and percentage of molecules resistant, degraded and produced during photolysis and  $\cdot\text{OH}$  photooxidation for RS and YL WSOM.

| Samples | Aging processes                    | Molecules                           | CHO  | CHON | CHOS | CHONS | Total |
|---------|------------------------------------|-------------------------------------|------|------|------|-------|-------|
| RS WSOM | Photolysis                         | Resistant (n)                       | 1731 | 2624 | 183  | 187   | 4725  |
|         |                                    | Degraded (n)                        | 200  | 337  | 122  | 170   | 829   |
|         |                                    | Produced (n)                        | 393  | 1165 | 82   | 18    | 1658  |
|         |                                    | Percentage of degraded in fresh (%) | 3.60 | 6.07 | 2.20 | 3.06  | 14.9  |
|         |                                    | Percentage of produced in aged (%)  | 6.16 | 18.3 | 1.28 | 0.38  | 26.0  |
|         | $\cdot\text{OH}$<br>photooxidation | Resistant (n)                       | 919  | 1030 | 116  | 70    | 2135  |
|         |                                    | Degraded (n)                        | 1012 | 1930 | 189  | 287   | 3418  |
|         |                                    | Produced (n)                        | 904  | 1813 | 460  | 160   | 3337  |
|         |                                    | Percentage of degraded in fresh (%) | 18.2 | 34.8 | 3.40 | 5.17  | 61.6  |
|         |                                    | Percentage of produced in aged (%)  | 16.5 | 33.1 | 8.41 | 6.97  | 61.0  |
| YL WSOM | Photolysis                         | Resistant (n)                       | 1480 | 1347 | 717  | 389   | 3933  |
|         |                                    | Degraded (n)                        | 219  | 408  | 285  | 269   | 1181  |
|         |                                    | Produced (n)                        | 703  | 868  | 215  | 37    | 1823  |
|         |                                    | Percentage of degraded in fresh (%) | 4.28 | 7.98 | 5.57 | 5.26  | 23.1  |
|         |                                    | Percentage of produced in aged (%)  | 12.2 | 15.1 | 3.74 | 0.93  | 31.7  |
|         | $\cdot\text{OH}$<br>photooxidation | Resistant (n)                       | 779  | 702  | 279  | 31    | 1791  |
|         |                                    | Degraded (n)                        | 920  | 1053 | 723  | 627   | 3323  |
|         |                                    | Produced (n)                        | 1010 | 1097 | 233  | 31    | 2371  |
|         |                                    | Percentage of degraded in fresh (%) | 18.0 | 20.6 | 14.1 | 12.3  | 65.0  |
|         |                                    | Percentage of produced in aged (%)  | 24.3 | 26.4 | 5.60 | 1.70  | 57.0  |



**Table S5.** The information of number and intensity-weighted average elemental ratios, DBE<sub>w</sub>, DBE/C<sub>w</sub>, AI<sub>mod,w</sub> and NOSC<sub>w</sub> for condensed aromatic compounds produced during ·OH photooxidation in RS and YL WSOM.

| Samples | Composition | Number | MW <sub>w</sub> | H/C <sub>w</sub> | O/C <sub>w</sub> | O/N <sub>w</sub> | O/S <sub>w</sub> | DBE <sub>w</sub> | DBE/C <sub>w</sub> | AI <sub>mod,w</sub> | NOSC <sub>w</sub> |
|---------|-------------|--------|-----------------|------------------|------------------|------------------|------------------|------------------|--------------------|---------------------|-------------------|
| RS WSOM | CHO         | 127    | 394             | 0.58             | 0.21             |                  |                  | 18.7             | 0.75               | 0.75                | -0.16             |
|         | CHON        | 380    | 601             | 0.61             | 0.16             | 2.25             |                  | 28.4             | 0.77               | 0.80                | -0.05             |
|         | CHOS        | 111    | 426             | 0.60             | 0.14             |                  | 3.69             | 19.7             | 0.74               | 0.73                | -0.25             |
|         | CHONS       | 41     | 524             | 0.64             | 0.14             | 4.34             | 4.34             | 23.5             | 0.73               | 0.72                | -0.20             |
|         | Total       | 659    | 483             | 0.60             | 0.16             | 0.95             | 1.37             | 22.6             | 0.75               | 0.76                | -0.15             |
| YL WSOM | CHO         | 55     | 377             | 0.53             | 0.18             |                  |                  | 19.3             | 0.78               | 0.78                | -0.18             |
|         | CHON        | 199    | 670             | 0.55             | 0.15             | 2.67             |                  | 33.4             | 0.78               | 0.80                | -0.06             |
|         | CHOS        | 64     | 443             | 0.57             | 0.12             |                  | 3.34             | 21.3             | 0.75               | 0.74                | -0.27             |
|         | CHONS       | 25     | 721             | 0.58             | 0.10             | 4.73             | 4.73             | 35.3             | 0.74               | 0.74                | -0.28             |
|         | Total       | 343    | 529             | 0.56             | 0.14             | 1.26             | 1.27             | 26.2             | 0.77               | 0.77                | -0.16             |



**Table S6.** The intensity-weighted average elemental ratios, DBE<sub>w</sub>, DBE/C<sub>w</sub>, AI<sub>mod,w</sub> and NOSC<sub>w</sub> for molecular resistant, degraded and produced after photolysis and ·OH photooxidation in RS and YL WSOM.

| Samples | Aging processes        |                    | MW <sub>w</sub> | H/C <sub>w</sub> | O/C <sub>w</sub> | O/N <sub>w</sub> | O/S <sub>w</sub> | DBE <sub>w</sub> | DBE/C <sub>w</sub> | AI <sub>mod,w</sub> | NOSC <sub>w</sub> |
|---------|------------------------|--------------------|-----------------|------------------|------------------|------------------|------------------|------------------|--------------------|---------------------|-------------------|
| RS WSOM | Photolysis             | Resistant in fresh | 249             | 1.19             | 0.38             | 1.02             | 0.14             | 6.36             | 0.51               | 0.45                | -0.35             |
|         |                        | Resistant in aged  | 278             | 1.17             | 0.43             | 1.24             | 0.09             | 6.95             | 0.51               | 0.42                | -0.24             |
|         |                        | Degraded           | 392             | 1.29             | 0.33             | 2.43             | 2.51             | 8.83             | 0.44               | 0.33                | -0.42             |
|         |                        | Produced           | 472             | 1.07             | 0.49             | 4.23             | 0.28             | 12.0             | 0.54               | 0.43                | 0.069             |
|         | • OH<br>photooxidation | Resistant in fresh | 226             | 1.16             | 0.41             | 0.83             | 0.11             | 5.93             | 0.53               | 0.47                | -0.28             |
|         |                        | Resistant in aged  | 278             | 1.18             | 0.58             | 1.27             | 0.09             | 6.22             | 0.51               | 0.37                | 0.042             |
|         |                        | Degraded           | 351             | 1.31             | 0.27             | 1.89             | 0.50             | 8.24             | 0.42               | 0.36                | -0.63             |
|         |                        | Produced           | 423             | 1.10             | 0.61             | 3.43             | 0.71             | 10.30            | 0.53               | 0.35                | 0.25              |
| YLWSOM  | Photolysis             | Resistant in fresh | 227             | 1.03             | 0.46             | 1.59             | 1.03             | 6.49             | 0.61               | 0.56                | 0.067             |
|         |                        | Resistant in aged  | 256             | 1.02             | 0.43             | 0.78             | 0.60             | 7.39             | 0.59               | 0.53                | -0.095            |
|         |                        | Degraded           | 403             | 1.09             | 0.38             | 2.94             | 2.86             | 11.18            | 0.55               | 0.50                | -0.041            |
|         |                        | Produced           | 458             | 1.03             | 0.46             | 2.60             | 0.67             | 12.51            | 0.55               | 0.44                | -0.042            |
|         | • OH<br>Photooxidation | Resistant in fresh | 208             | 1.01             | 0.48             | 1.53             | 0.84             | 6.02             | 0.63               | 0.57                | 0.11              |
|         |                        | Resistant in aged  | 254             | 1.02             | 0.55             | 0.80             | 0.12             | 6.82             | 0.59               | 0.50                | 0.12              |
|         |                        | Degraded           | 355             | 1.10             | 0.35             | 2.16             | 2.37             | 9.88             | 0.54               | 0.47                | -0.20             |
|         |                        | Produced           | 425             | 1.03             | 0.60             | 1.84             | 0.18             | 10.59            | 0.55               | 0.39                | 0.20              |



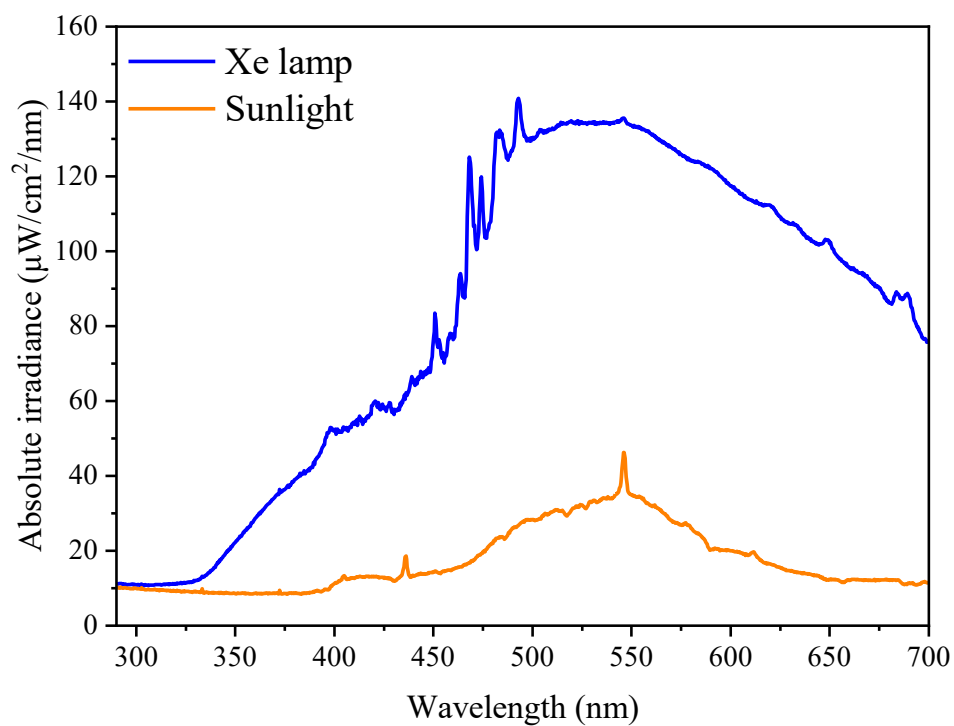

**Figure S1.** Spectra of Xe lamp and actual Sunlight (obtained at noon of May 20, 2023, Guangzhou)



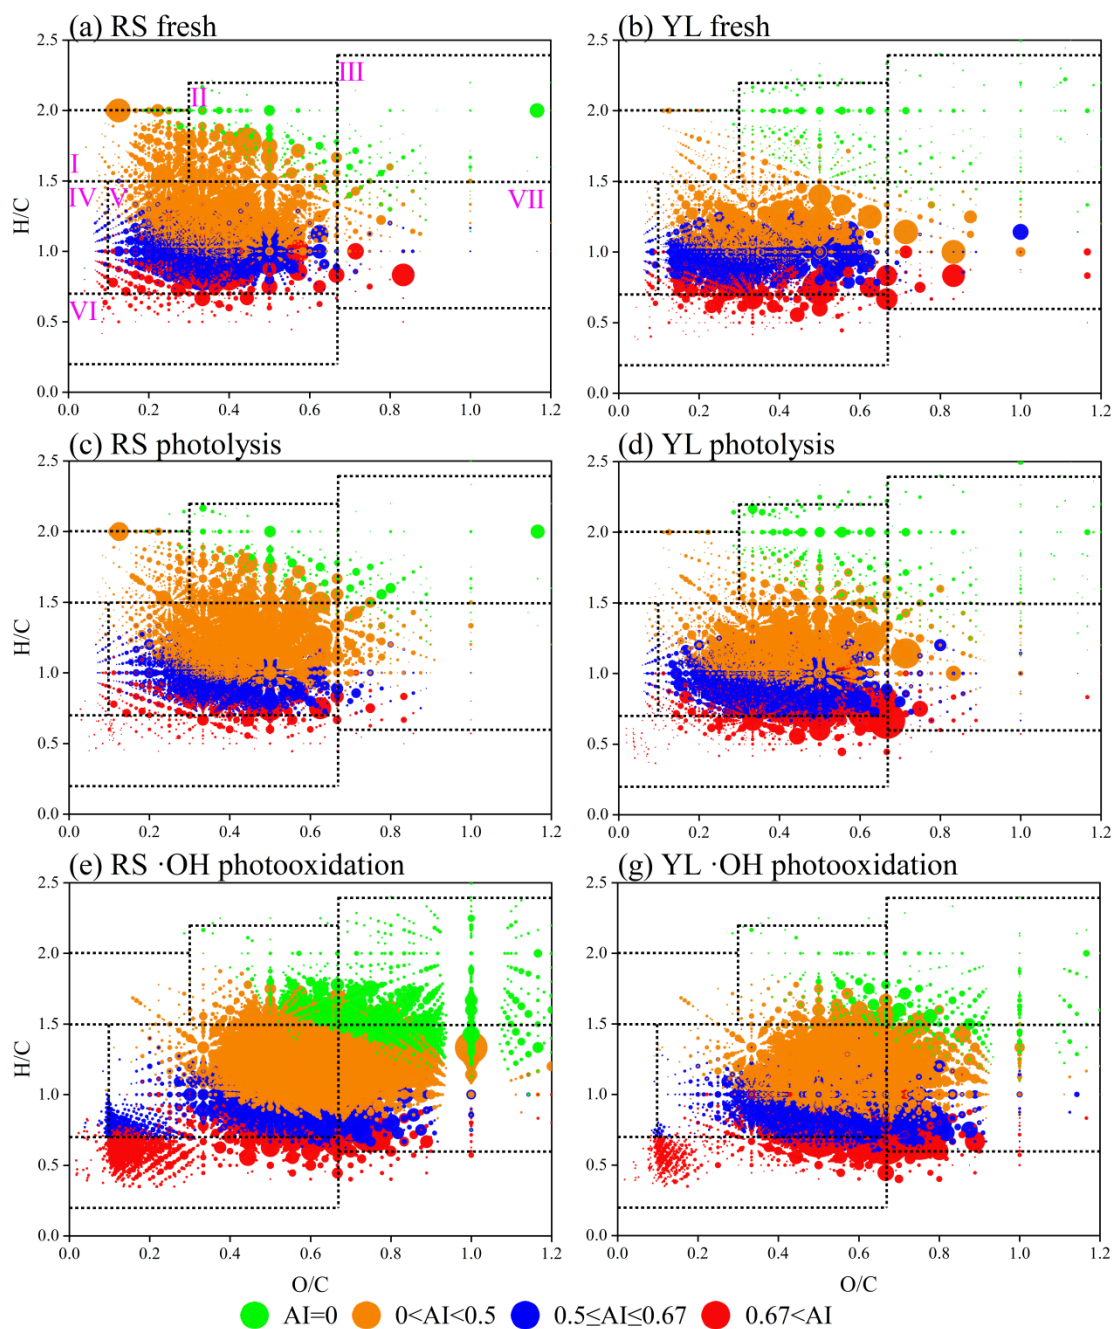

**Figure S2.** Van Krevelen diagrams of molecular formulas in RS WSOM (a: fresh, c: photolysis, e:  $\cdot$ OH photooxidation) and YL WSOM (b: fresh, d: photolysis, f:  $\cdot$ OH photooxidation). The seven regions represent: I lipids-like, II protein /aliphatic sugar, III carbohydrates, IV unsaturated hydrocarbon, V lignin/CRAM-like, VI condensed aromatic, VII tannins.



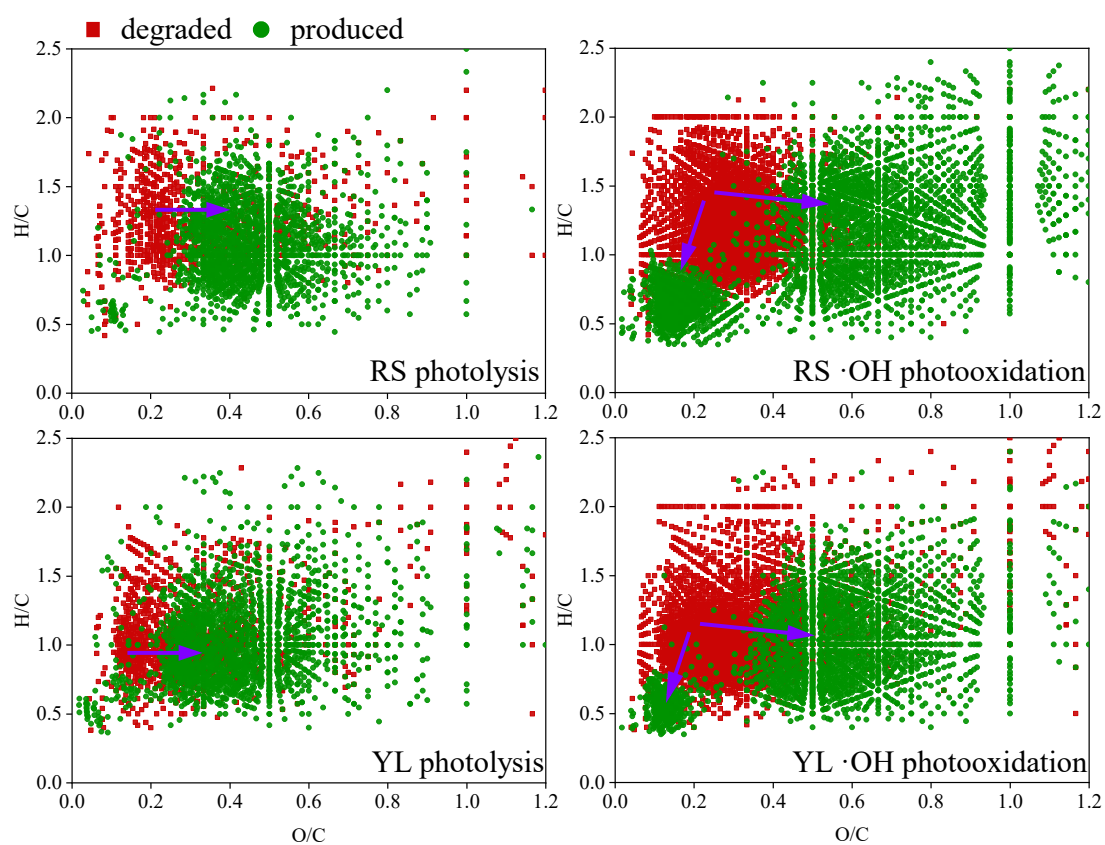

**Figure S3.** Van Krevelen diagrams for molecules degraded and produced during photolysis and  $\cdot\text{OH}$  photooxidation within RS (upper) and YL WSOM (bottom).



## References:

- Fan, X., Yu, X., Wang, Y., Xiao, X., Li, F., Xie, Y., Wei, S., Song, J., and Peng, P. A.:  
The aging behaviors of chromophoric biomass burning brown carbon during dark  
aqueous hydroxyl radical oxidation processes in laboratory studies, *Atmospheric  
Environment*, 205, 9-18, 10.1016/j.atmosenv.2019.02.039, 2019.
- Hecobian, A., Zhang, X., Zheng, M., Frank, N., Edgerton, E. S., and Weber, R. J.:  
Water-Soluble Organic Aerosol material and the light-absorption characteristics of  
aqueous extracts measured over the Southeastern United States, *Atmospheric  
Chemistry and Physics*, 10, 5965-5977, 10.5194/acp-10-5965-2010, 2010.
- Jiang, H., Li, J., Sun, R., Tian, C., Tang, J., Jiang, B., Liao, Y., Chen, C.-E., and Zhang,  
G.: Molecular Dynamics and Light Absorption Properties of Atmospheric  
Dissolved Organic Matter, *Environmental science & technology*, 55, 10268-10279,  
10.1021/acs.est.1c01770, 2021.
- LaRowe, D.E. and Van Cappellen, P.: Degradation of natural organic matter: A  
thermodynamic analysis. *Geochimica et Cosmochimica Acta*, 75, 2030-2042,  
10.1016/j.gca.2011.01.020, 2011.
